# Supplementary material for: Multi-scale structure optimization of boron-doped hard carbon nanospheres boosting the plateau capacity for high performance sodium ion batteries
Source: Royal Society of Chemistry journal article supplement (doi:10.1039/d2ta04194d), 2022-01-01
Supplement: d2ta04194d1.pdf [file d2ta04194d1.pdf]

## Supporting Information

### **Multi-scale structure optimization of boron-doped hard carbon nanospheres boosting plateau capacity for high performance sodium ion battery**

Dongyang Wu,<sup>a</sup> Fei Sun,<sup>\*a</sup> Zhibin Qu,<sup>a</sup> Hua Wang,<sup>a</sup> Zhuojia Lou,<sup>a</sup> Bin Wu,<sup>b</sup> and Guangbo Zhao<sup>\*a</sup>

<sup>a</sup> School of Energy Science and Engineering, Harbin Institute of Technology, Harbin, 150001, China

<sup>b</sup> School of Chemistry and Chemical Engineering, Shanghai University of Engineering Science, Shanghai 201620, China

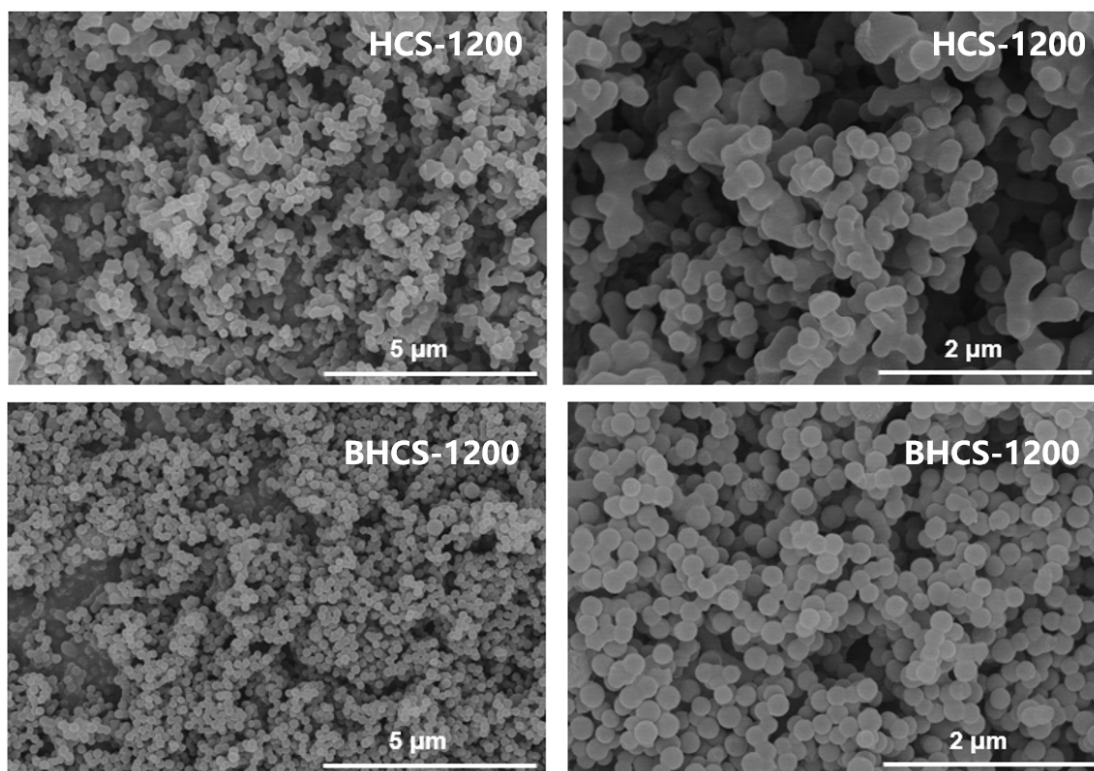

**Figure S1.** SEM images of HCS-1200 and BHCS-1200 at different magnification rates.

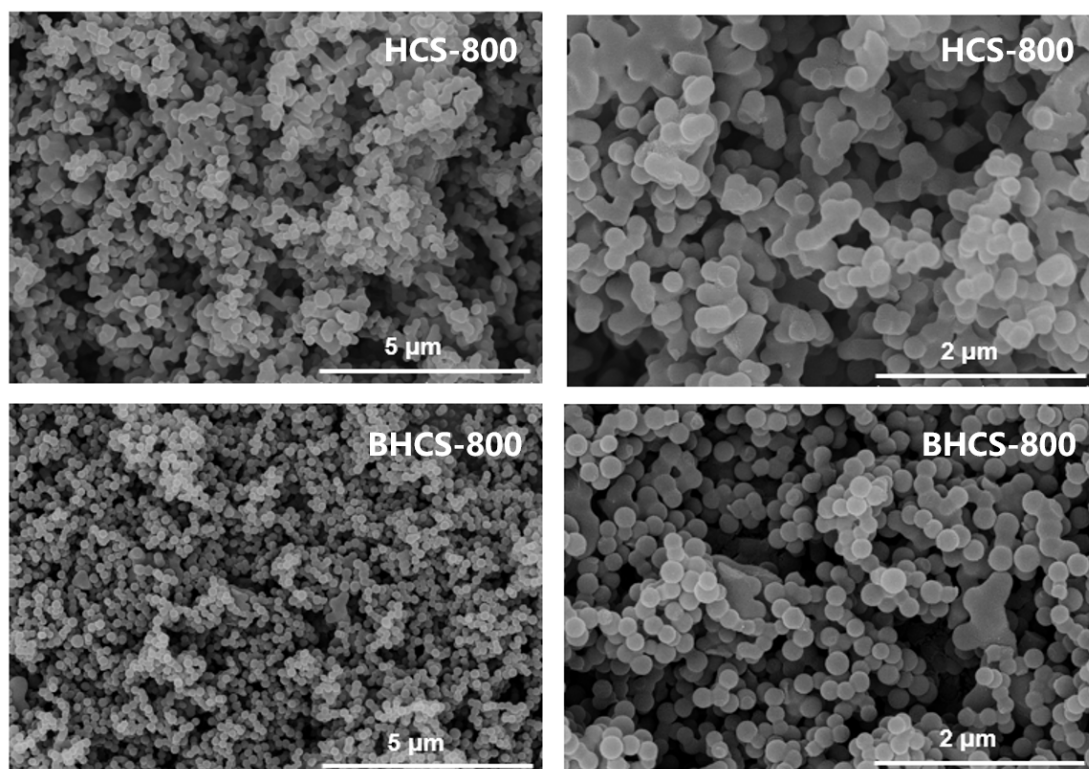

**Figure S2.** SEM images of HCS-800 and BHCS-800 at different magnification rates.

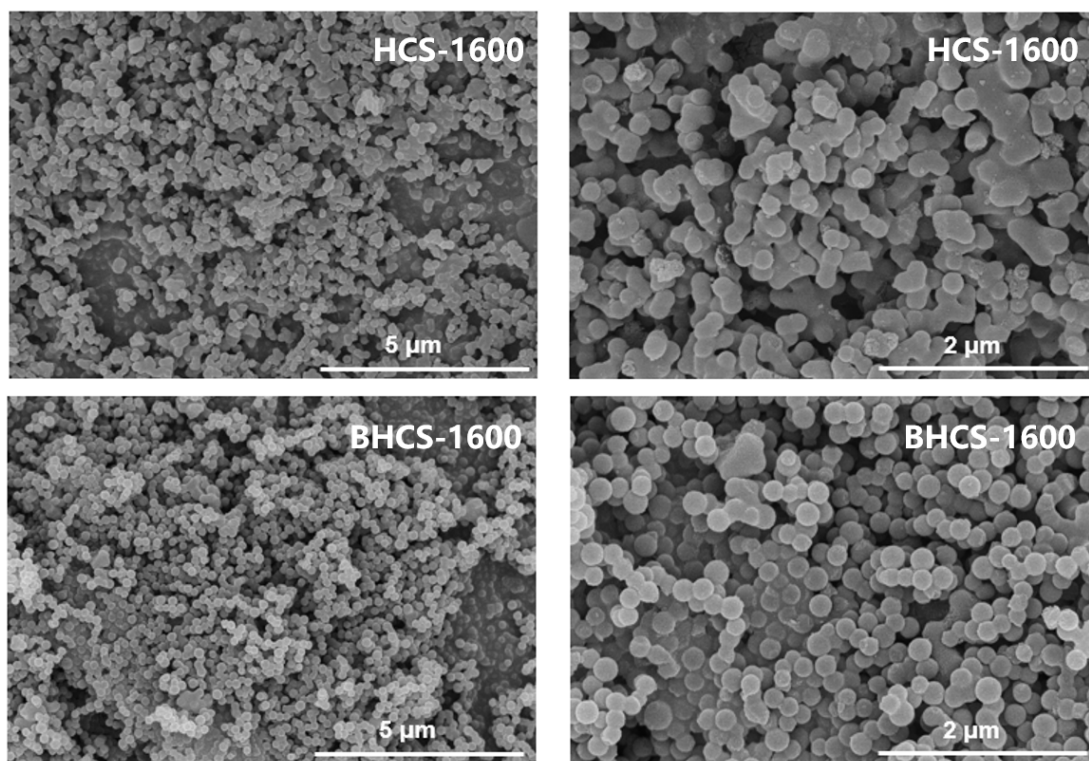

**Figure S3.** SEM images of HCS-1600 and BHCS-1600 at different magnification rates.

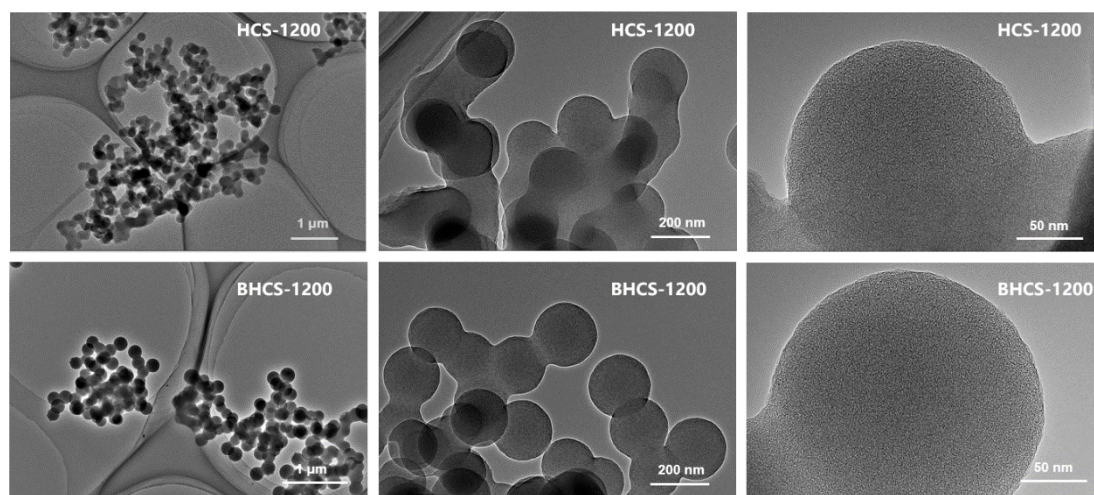

**Figure S4.** TEM and HRTEM images of HCS-1200 and BHCS-1200 at different magnification rates.

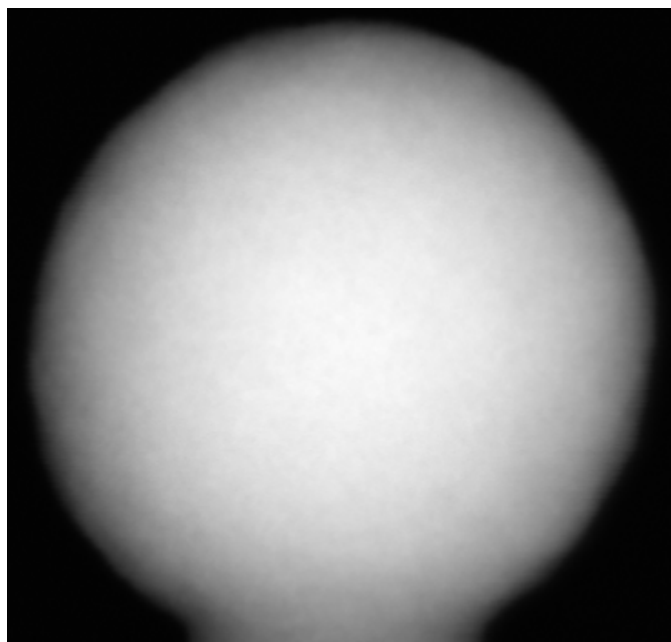

**Figure S5.** Electron image of BHCS-1200.

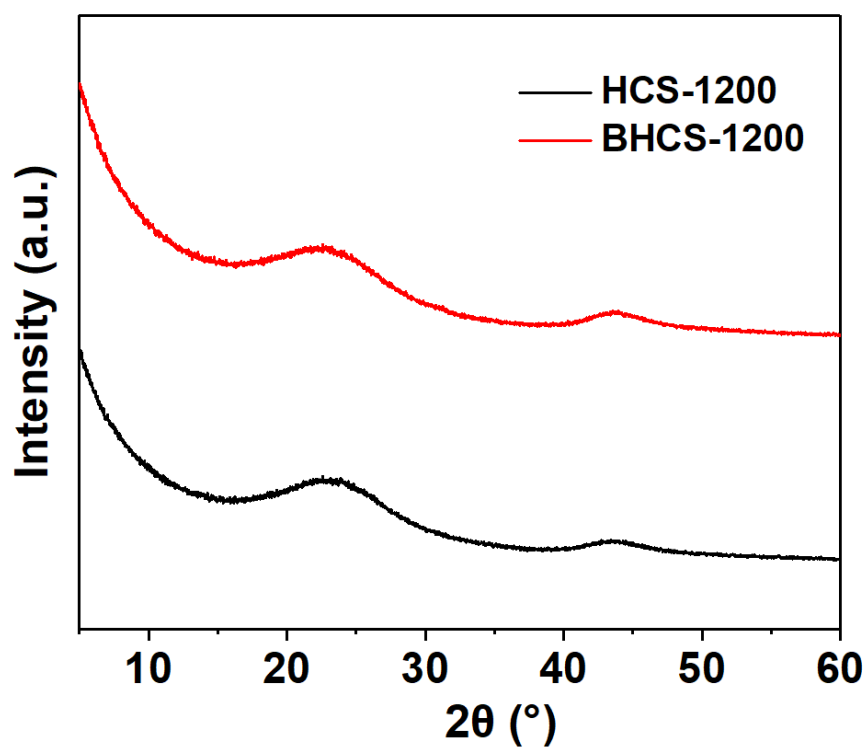

**Figure S6.** XRD patterns of HCS-1200 and BHCS-1200.

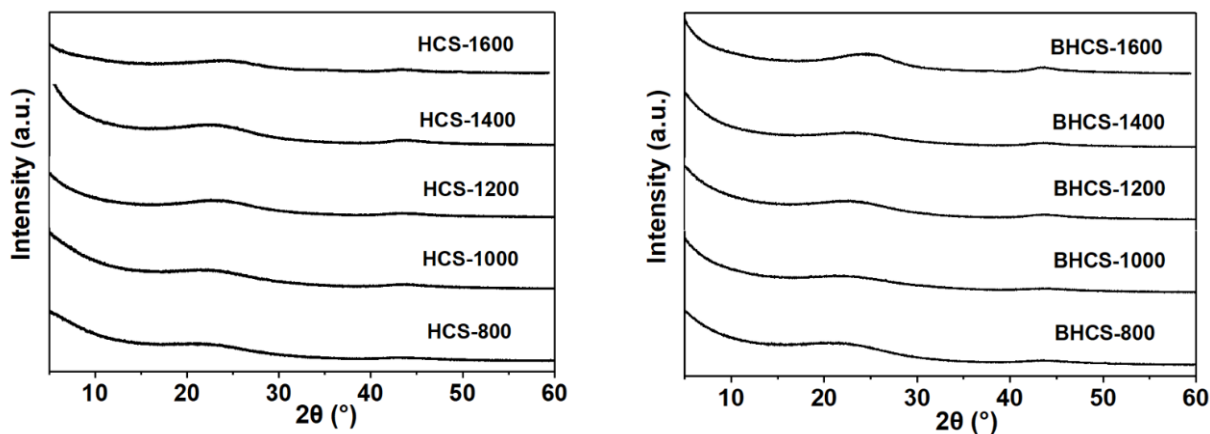

**Figure S7.** XRD patterns of HCS-x and BHCS-x.

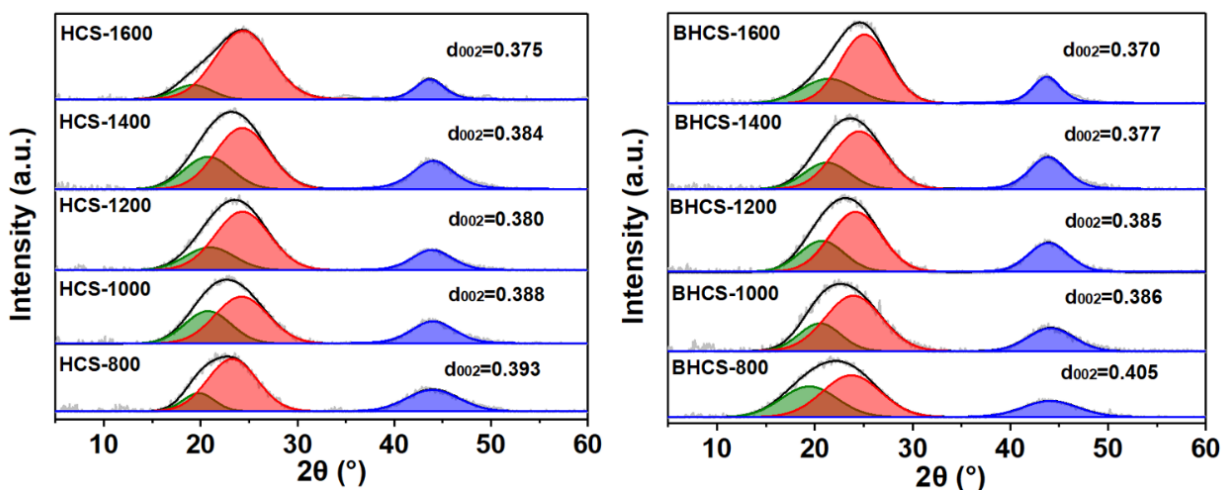

**Figure S8.** Deconvoluted XRD patterns of HCS-x and BHCS-x with  $d_{002}$  parameters.

**Table S1.** Structural parameters of microcrystals from XRD patterns for HCS-x and BHCS-x.

| Samples   | $d_{002}$ (nm) | $L_a$ (nm) | $L_c$ (nm) |
|-----------|----------------|------------|------------|
| HCS-800   | 0.393          | 2.766      | 1.419      |
| BHCS-800  | 0.405          | 2.648      | 1.158      |
| HCS-1000  | 0.388          | 3.329      | 1.305      |
| BHCS-1000 | 0.386          | 3.171      | 1.258      |



|           |       |       |       |
|-----------|-------|-------|-------|
| HCS-1200  | 0.380 | 3.592 | 1.249 |
| BHCS-1200 | 0.385 | 3.652 | 1.349 |
| HCS-1400  | 0.384 | 3.467 | 1.273 |
| BHCS-1400 | 0.377 | 3.923 | 1.317 |
| HCS-1600  | 0.375 | 4.934 | 1.222 |
| BHCS-1600 | 0.370 | 5.142 | 1.329 |

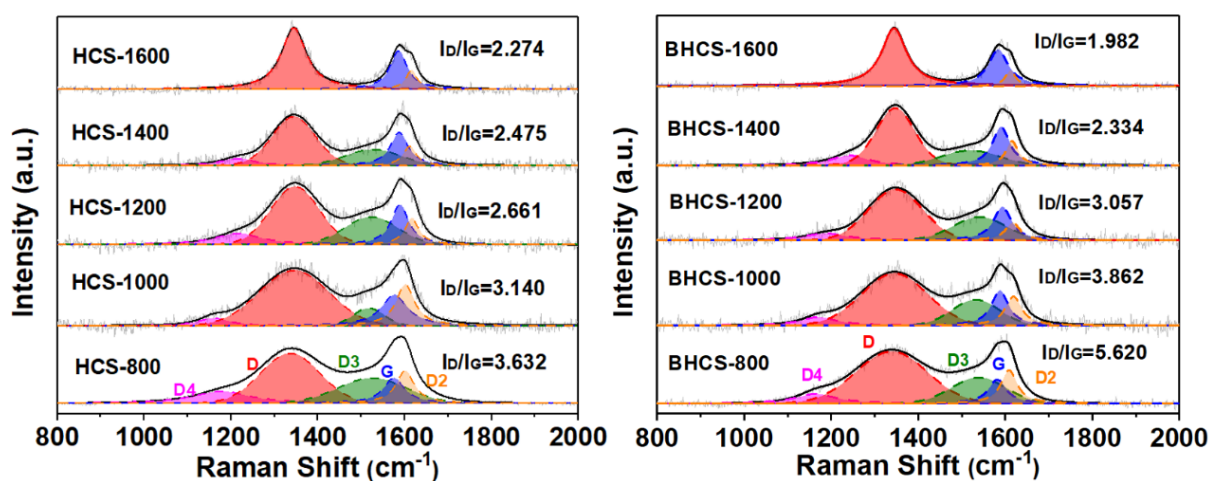

**Figure S9.** Deconvoluted Raman spectras of HCS-*x* and BHCS-*x* with  $I_D / I_G$  parameters.

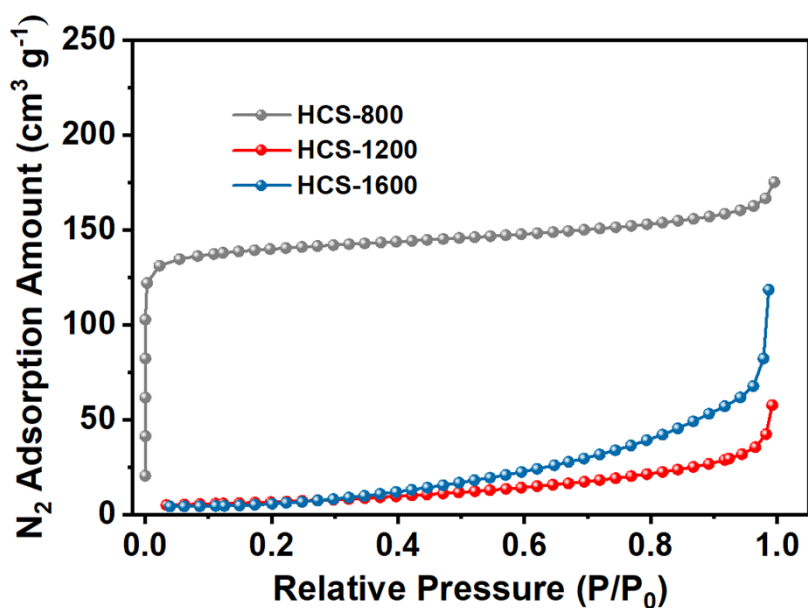

**Figure S10.** N<sub>2</sub> adsorption isotherms of HCS-800, HCS-1200 and HCS-1600.

**Table S2.** Content of boron doping configurations from XPS spectrum for BHCS-800, BHCS-1200 and BHCS-1600.

| Samples   | BC <sub>3</sub> (%) | BC <sub>2</sub> O (%) | BCO <sub>2</sub> (%) | B <sub>4</sub> C (%) |
|-----------|---------------------|-----------------------|----------------------|----------------------|
| BHCS-800  | 19.49               | 31.47                 | 49.04                |                      |
| BHCS-1200 | 44.13               | 28.77                 | 27.10                |                      |
| BHCS-1600 | 42.13               | 17.61                 | 16.48                | 24.08                |

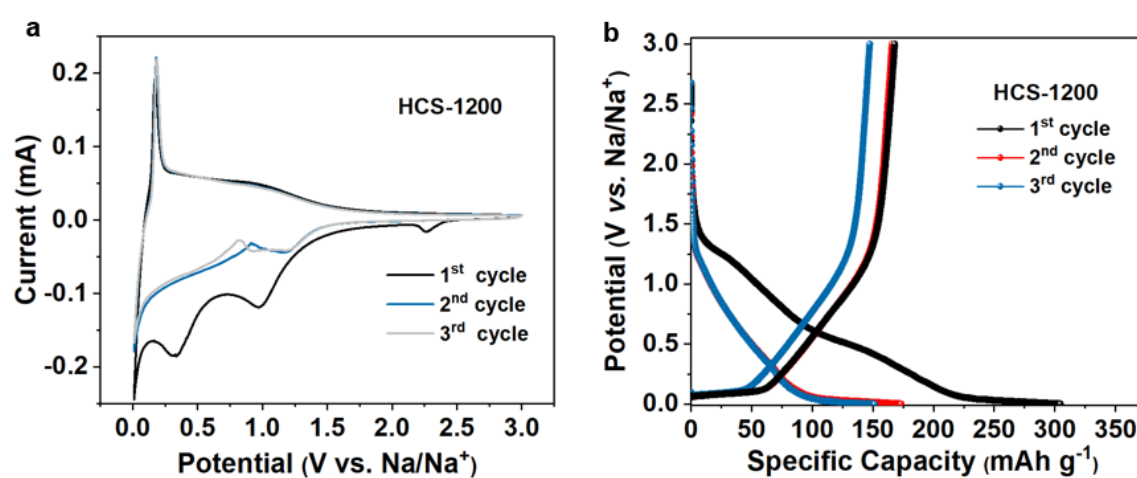

**Figure S11.** Na<sup>+</sup> anodic performances of HCS-1200 using coin-type cells in 1 M NaPF<sub>6</sub> electrolyte with mass loading of 0.8-1.2 mg cm<sup>-2</sup>. (a) CV curves of HCS-1200 at the scan rate of 0.2 mV s<sup>-1</sup>. (b) Initial three discharge–charge curves of HCS-1200 at the current density of 0.03 A g<sup>-1</sup>.

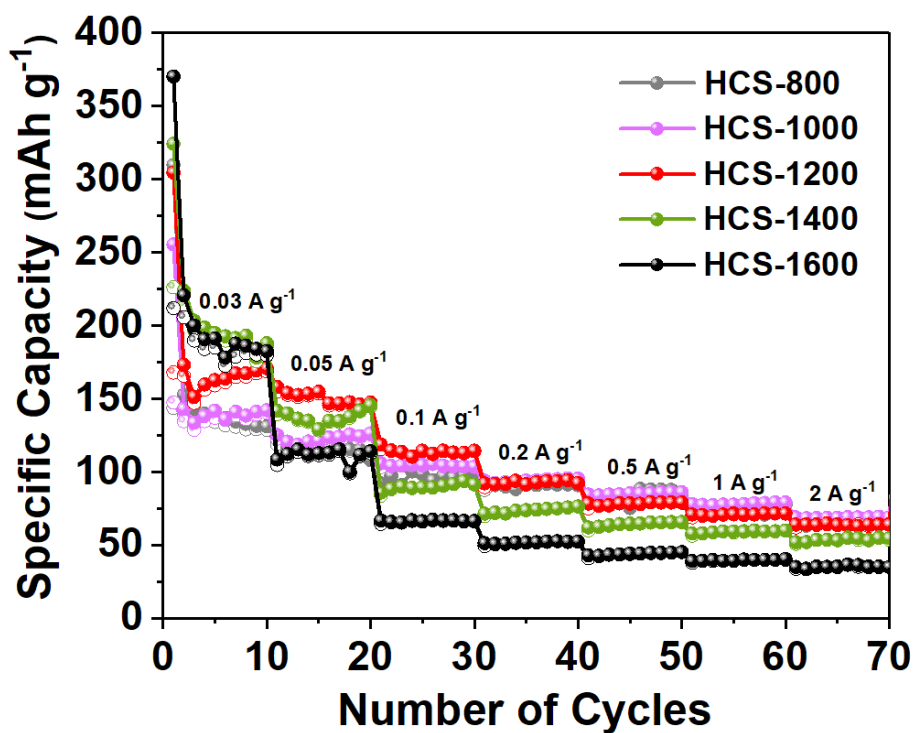

Figure S12. Rate performances of HCS-x.

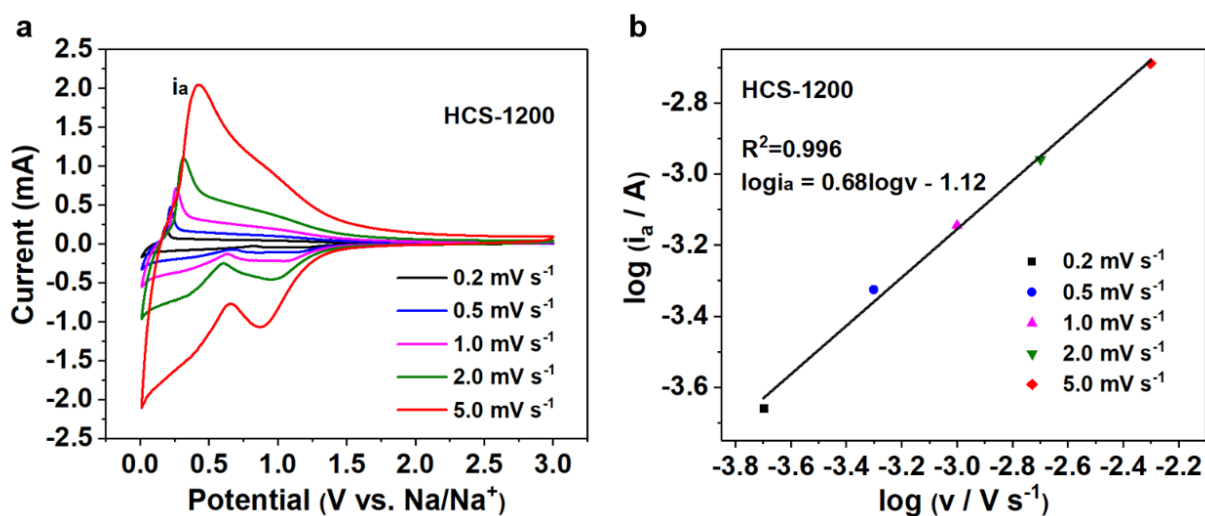

Figure S13. (a) CV curves of HCS-1200 at various scan rates. (b)  $b$ -value calculation according to the relationship between peak current and scan rate of HCS-1200.



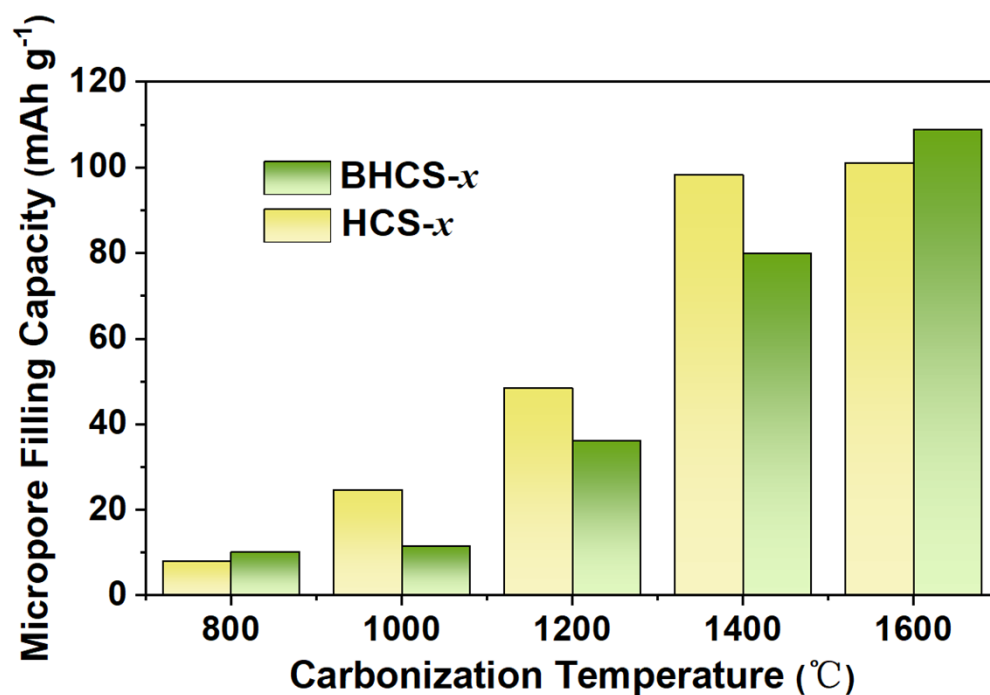

**Figure S14.** Capacities calculated from the micropore filling ( $<0.03\text{V}$ ) in the 2nd cycle of HCS-x and BHCS-x.

**Table S3.** HOMO, LUMO and band gap of carbon surface with different boron doping configurations.

|      | pristine carbon surface (eV) | BC <sub>3</sub> (eV) | BC <sub>2</sub> O (eV) | BCO <sub>2</sub> (eV) |
|------|------------------------------|----------------------|------------------------|-----------------------|
| HOMO | -5.095754                    | -5.252507            | -5.326348              | -5.142229             |
| LUMO | -2.432218                    | -2.86461             | -2.278184              | -2.444216             |
| Gap  | 2.663537                     | 2.387897             | 3.048163               | 2.698013              |

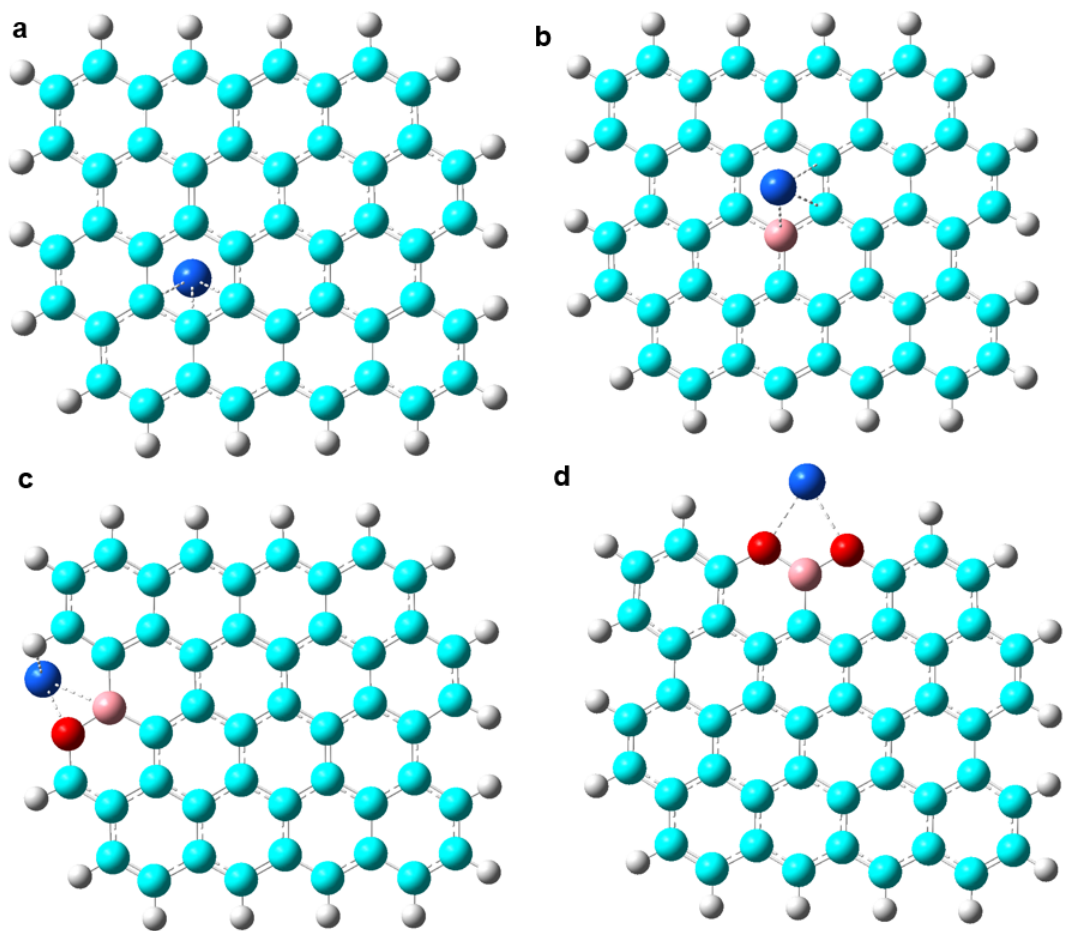

**Figure S15.** Na<sup>+</sup> adsorption configurations on various carbon surfaces.

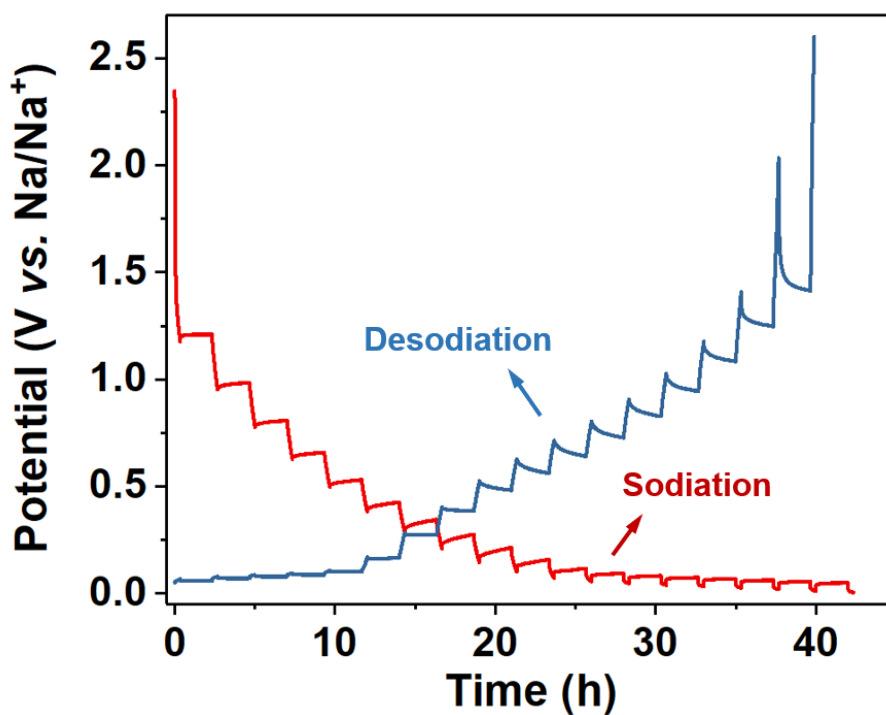

**Figure S16.** Galvanostatic intermittent titration technique (GITT) potential profiles of HCS-1200.

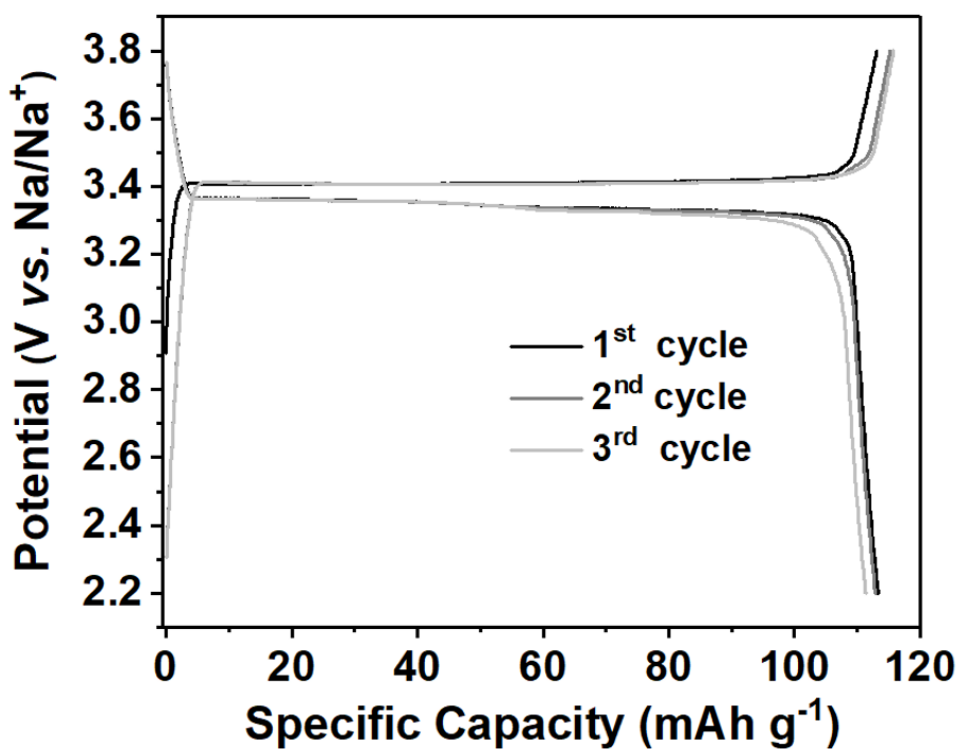

**Figure S17.** Initial three charge-discharge curves of NVP at the current density of 0.03 A g<sup>-1</sup>

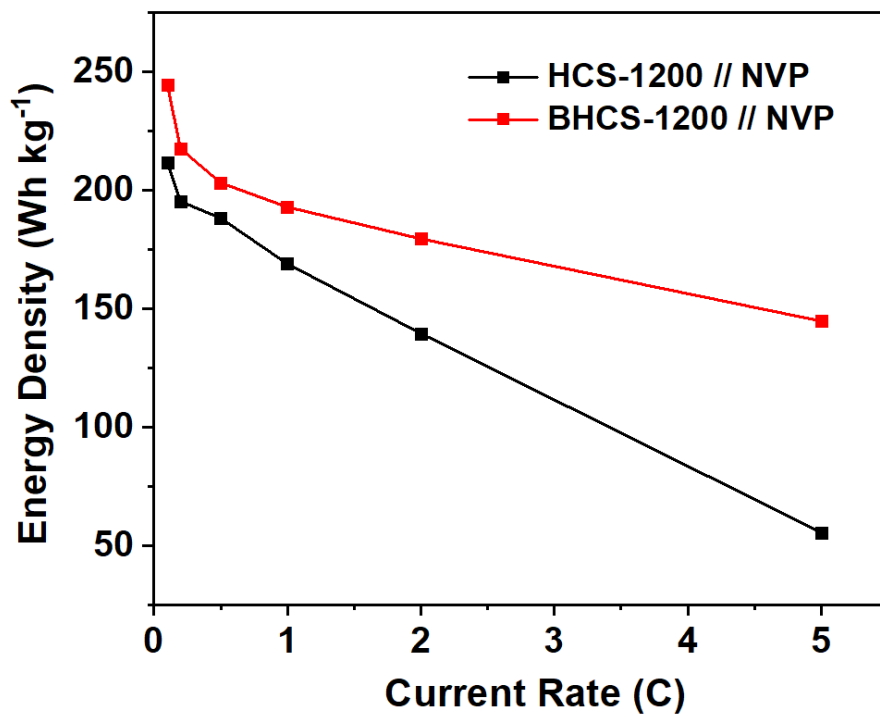

**Figure S18.** Energy densities of HCS-1200//NVP and BHCS-1200//NVP full-cells at different rates.
